# Supplementary material for: Differences in the Growth and the Ecophysiology of Newly Bred, Drought-Tolerant Black Locust Clones
Source: MDPI journal article supplement (doi:10.3390/f14091802), 2023-09-04
Supplement: s1 [file s1]

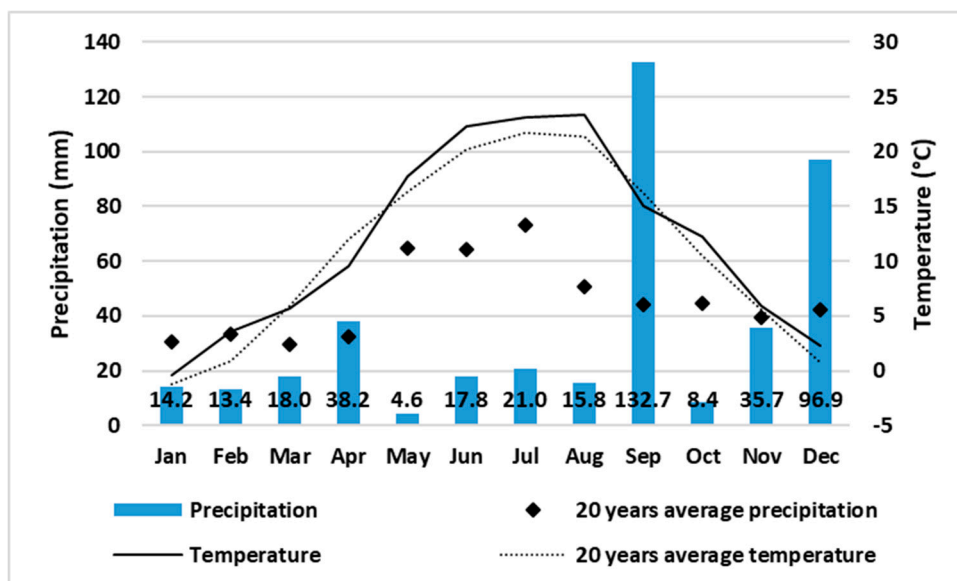

**Supplemental Figure S1.** Monthly sums of precipitation and averages of temperature (Napkor, 2022). Numbers in the bars: sum precipitation of the month.

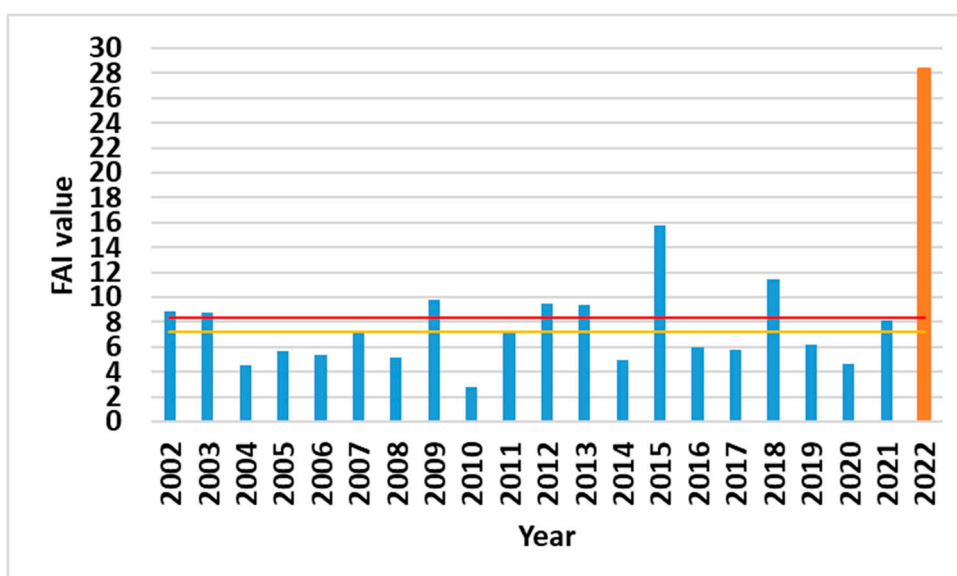

**Supplemental Figure S2.** Representation of the extremity of FAI in the year 2022. Red line shows the mean FAI for the period 2002–2022, yellow line shows the value between the turkey oak-sessile oak forest and the forest-steppe climate classes.

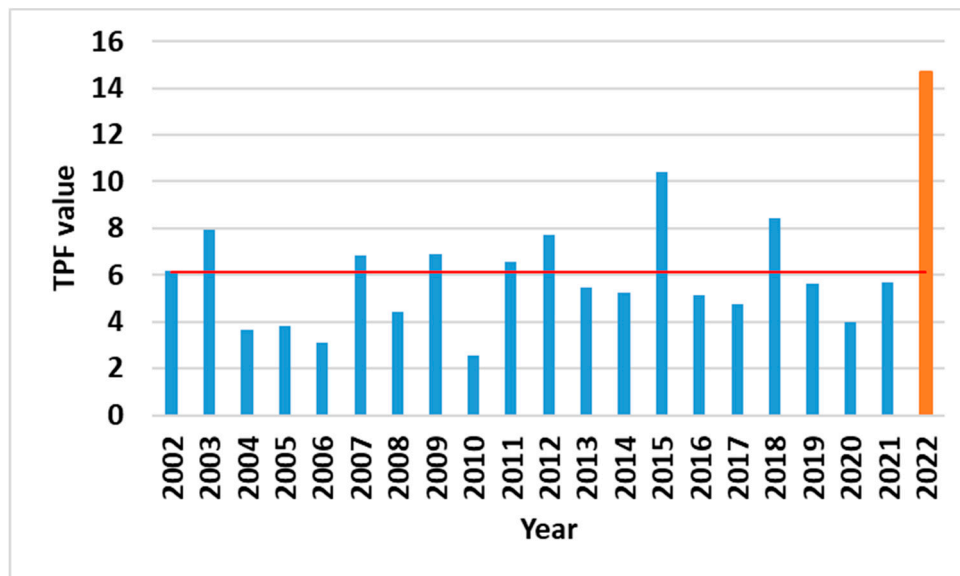

**Supplemental Figure S3.** TPF value between 2002 and 2022. Red line shows the mean value for the period 2002–2022.

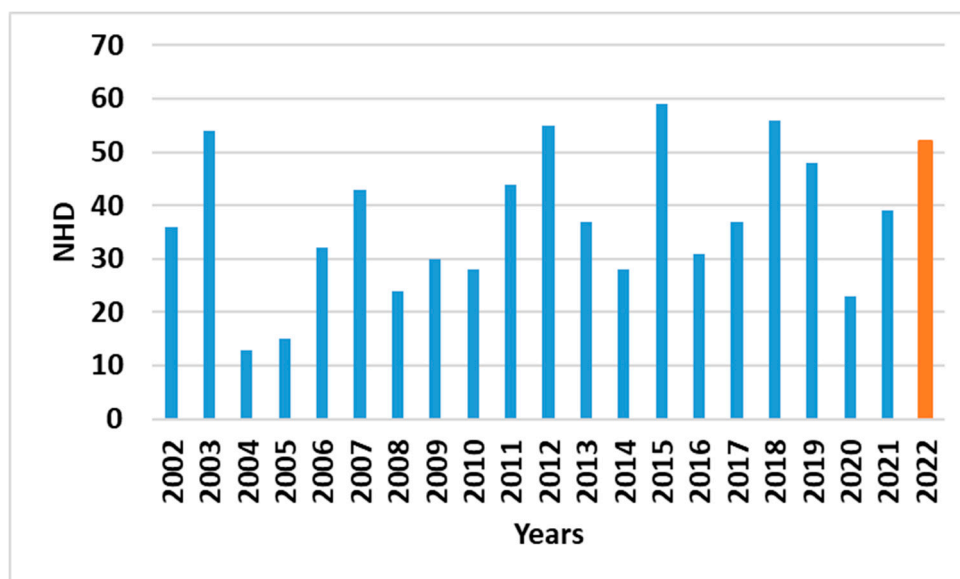

**Supplemental Figure S4.** Yearly NHD between 2002 and 2022. Hot days were defined as those when daily maximum air temperature,  $T_{\max} \geq 29.5$  °C.
